# Supplementary material for: S-Nitrosoglutathione (GSNO)-Mediated Lead Detoxification in Soybean through the Regulation of ROS and Metal-Related Transcripts
Source: MDPI journal article supplement (doi:10.3390/ijms24129901), 2023-06-08
Supplement: s1 [file s1]

**Table S1.** List of primers used for real-time PCR analysis.

|    | Gene Name        | Description                                                     | Forward Primer            | Reverse Primer            |
|----|------------------|-----------------------------------------------------------------|---------------------------|---------------------------|
| 1. | <i>GmhPCS1</i>   | Phytochelatin synthase 1 (PCS1)                                 | AAGGCTTGCTATCAAGGAAGAGG   | CTGATACTTGTTGCCTGCTGC     |
|    | <i>GmG6PDH2</i>  | Glucose-6-phosphate dehydrogenase                               | AGCTAACTCTGCTTCACTTGGT    | GCTGGTAAGAATCCCTGCCG      |
| 2. | <i>GmNRAMP1b</i> | Metal transporter NRAMP2-related                                | GAATTGGCCCTGTCCTCAAGATTA  | GTGGTAGCAACTGTCTTTGATCG   |
| 3. | <i>GmPDR12</i>   | Pleiotropic drug resistant / ABC transporter                    | TATGCAGTGTGGAATCTCTTCTCAG | CAATCCATACAAACTCCATGCTACA |
| 4. | <i>GmGolS</i>    | Galactinol synthase                                             | GTGACCACAACCCTTCCTCC      | TCAACGTTCTCAGGGTGACG      |
| 5. | <i>GmGSNOR1</i>  | S-Nitrosogluthathione Reductase / alcohol dehydrogenase class-3 | TGTTGGGTTGCTTTTCCCCT      | TCTTTCTGATCACAAGTTTGCCA   |
| 6. | <i>GmGSH2</i>    | Glutathione synthase / GSH synthetase                           | GAAAGAGGCCAAAATGGGCG      | ACGCTTCCTGATCTCTGAACG     |
| 7. | <i>GmELF1b</i>   | Reference gene                                                  | CCACTGCTGAAGAAGATGATGATG  | AAGGACAGAAGACTTGCCACTC    |

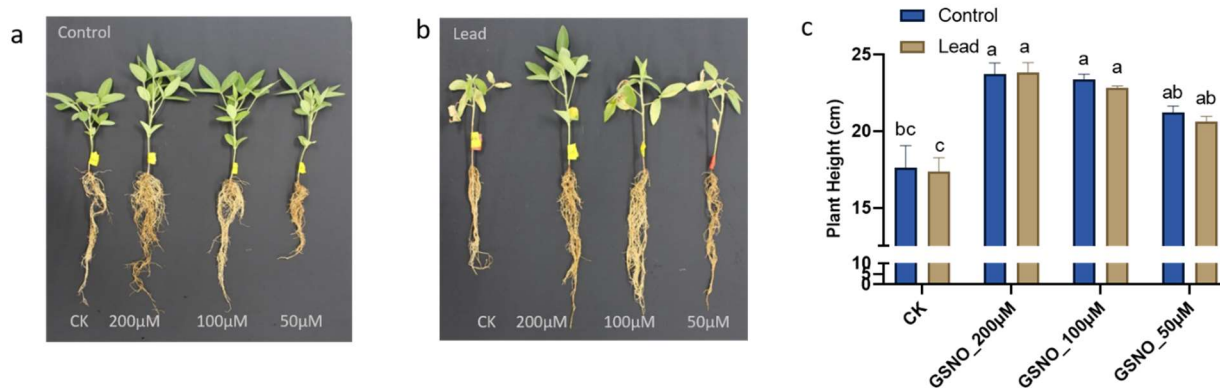

**Figure S1.** Effect of GSNO supplementation on (a) phenotype under control condition, (b) phenotype under lead stress and (c) plant height under lead stress. The mean of three replicates were used. Bars exhibiting different letters indicate significant differences as evaluated by Tukey's test and t-test at  $P \leq 0.05$ .
